# Supplementary material for: Tuning mucoadhesion and mucopenetration in self-assembled poly(lactic acid)-block-poly(oligoethylene glycol methacrylate) block copolymer nanoparticles by controlling side-chain lengths
Source: Royal Society of Chemistry journal article supplement (doi:10.1039/d4nr03805c), 2024-11-22
Supplement: d4nr03805c1.pdf [file d4nr03805c1.pdf]

**Electronic Supporting Information (ESI)**

**Tuning mucoadhesion and mucopenetration in self-assembled  
poly(lactic acid)-block-poly(oligoethylene glycol methacrylate) block  
copolymer nanoparticles by controlling side-chain lengths**

Ridhdhi Dave, Jon Mofford, Emily-Anne Hicks, Andrew Singh, Heather Sheardown\*, and Todd Hoare\*

Department of Chemical Engineering, McMaster University, 1280 Main St. W, Hamilton, Ontario, Canada, L8S 4L7

\* To whom correspondence should be addressed

E-mail: hoaretr@mcmaster.ca (T. Hoare); sheadow@mcmaster.ca (H. Sheardown)

## 1. Modified Ussing Chamber Diffusion System

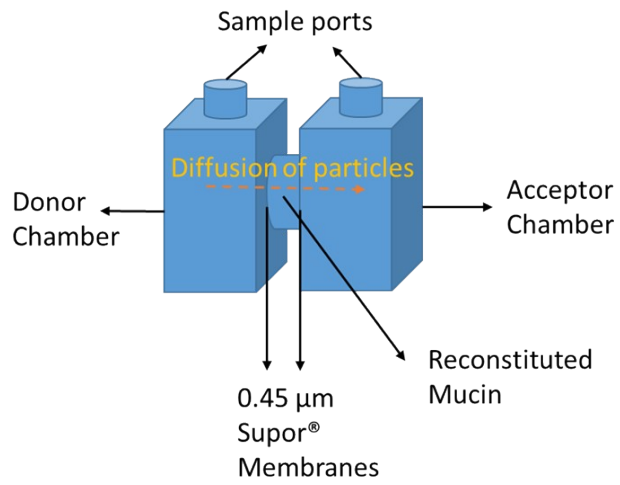

*Figure S1:* Schematic of modified Ussing chamber diffusion system used to measure nanoparticle diffusion through a mucosal membrane.

## 2. PLA-POEGMA<sub>n</sub> Polymer GPC Traces

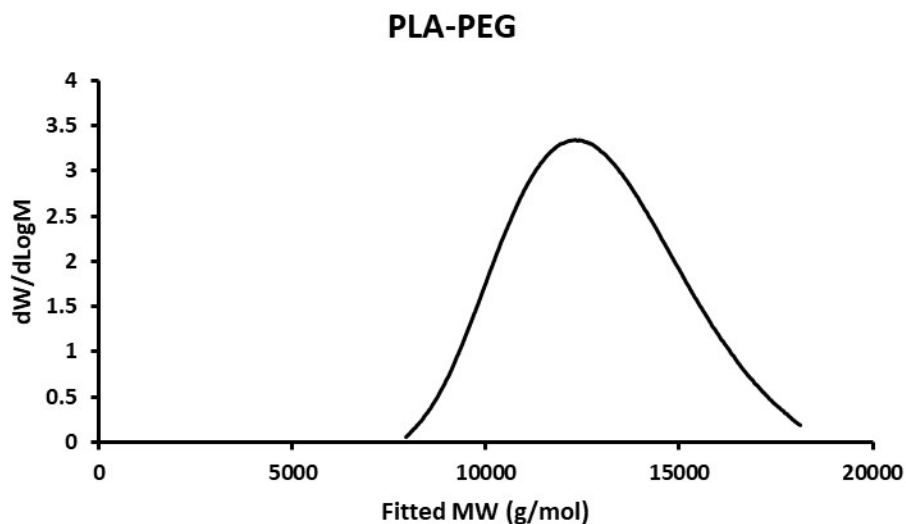

*Figure S2:* Molecular weight distribution of PLA-PEG polymer dissolved in DMF with 25 mM LiBr (2 mg/mL polymer concentration).

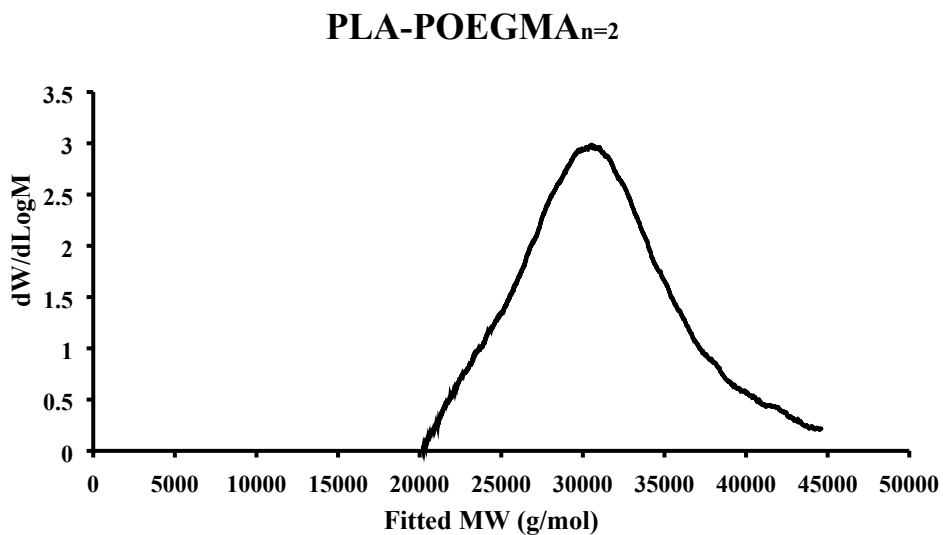

*Figure S3:* Molecular weight distribution of PLA-POEGMA<sub>n=2</sub> polymer dissolved in DMF with 25 mM LiBr (2 mg/mL polymer concentration).

### PLA-PO10

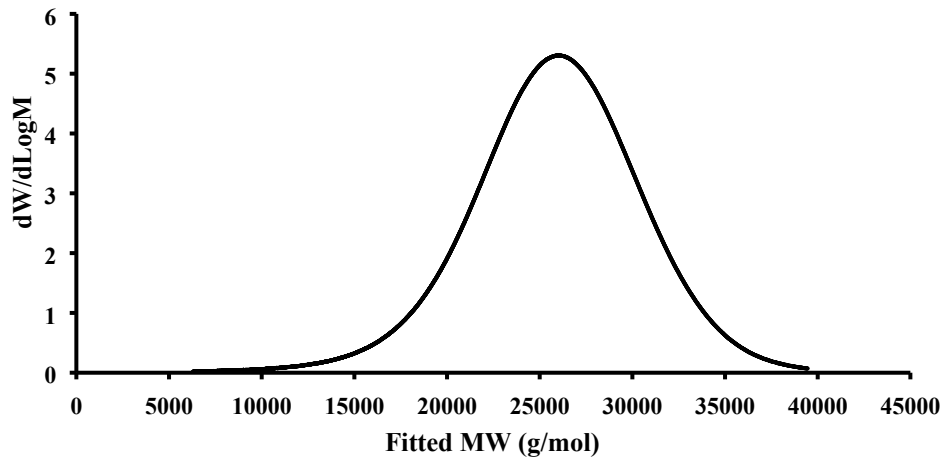

Figure S4: Molecular weight distribution of PLA-PO10 polymer dissolved in DMF with 25 mM LiBr (2 mg/mL polymer concentration).

### PLA-POEGMA<sub>n=8,9</sub>

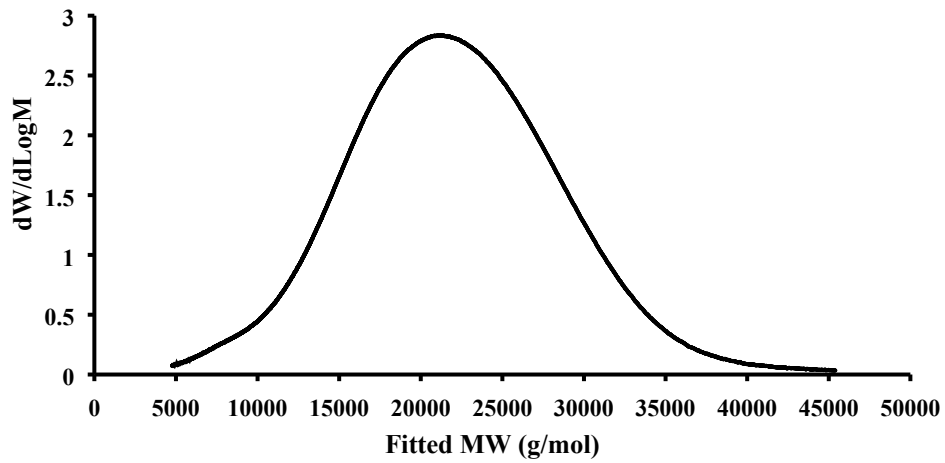

Figure S5: Molecular weight distribution of PLA-POEGMA<sub>n=8,9</sub> polymer dissolved in DMF with 25 mM LiBr (2 mg/mL polymer concentration).

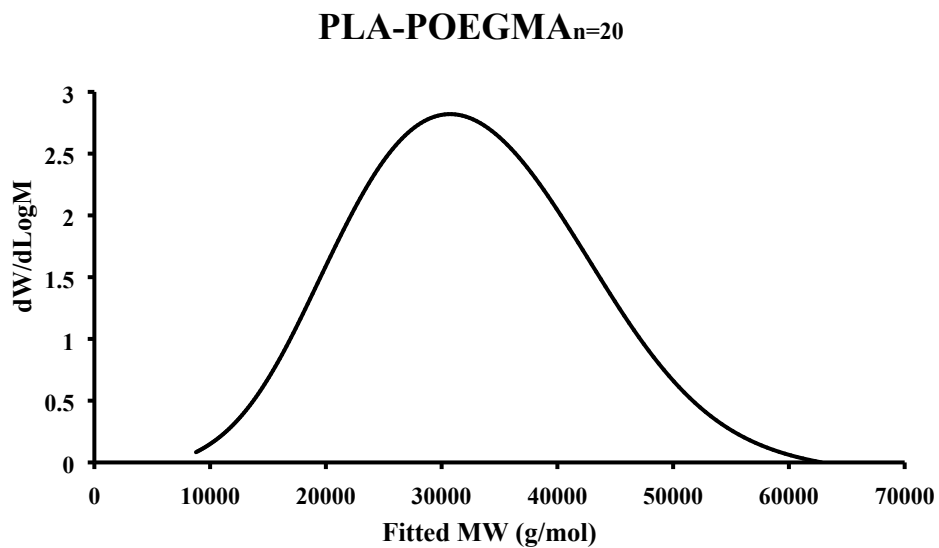

*Figure S6:* Molecular weight distribution of PLA-POEGMA<sub>n=20</sub> polymer dissolved in DMF with 25 mM LiBr (2 mg/mL polymer concentration).

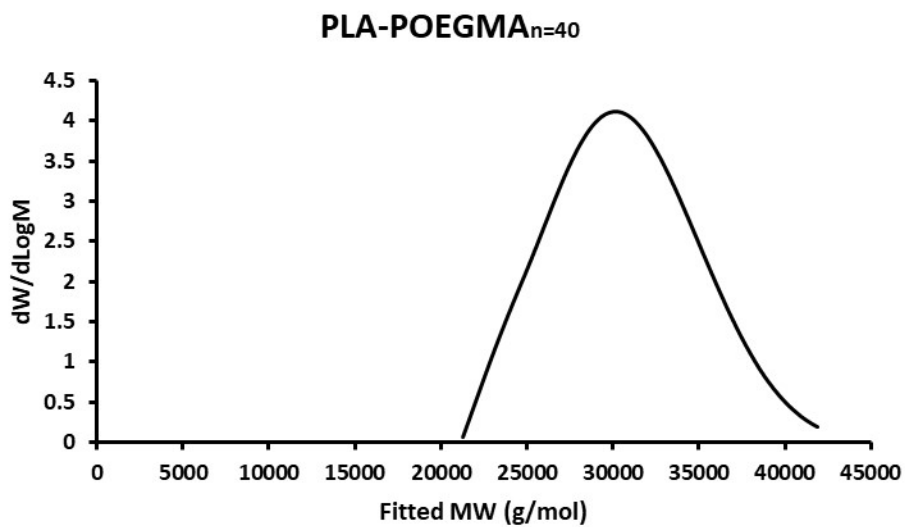

*Figure S7:* Molecular weight distribution of PLA-POEGMA<sub>n=40</sub> polymer dissolved in DMF with 25 mM LiBr (2 mg/mL polymer concentration).

### 3. PLA-POEGMA<sub>n</sub> Polymer <sup>1</sup>H NMR Spectra

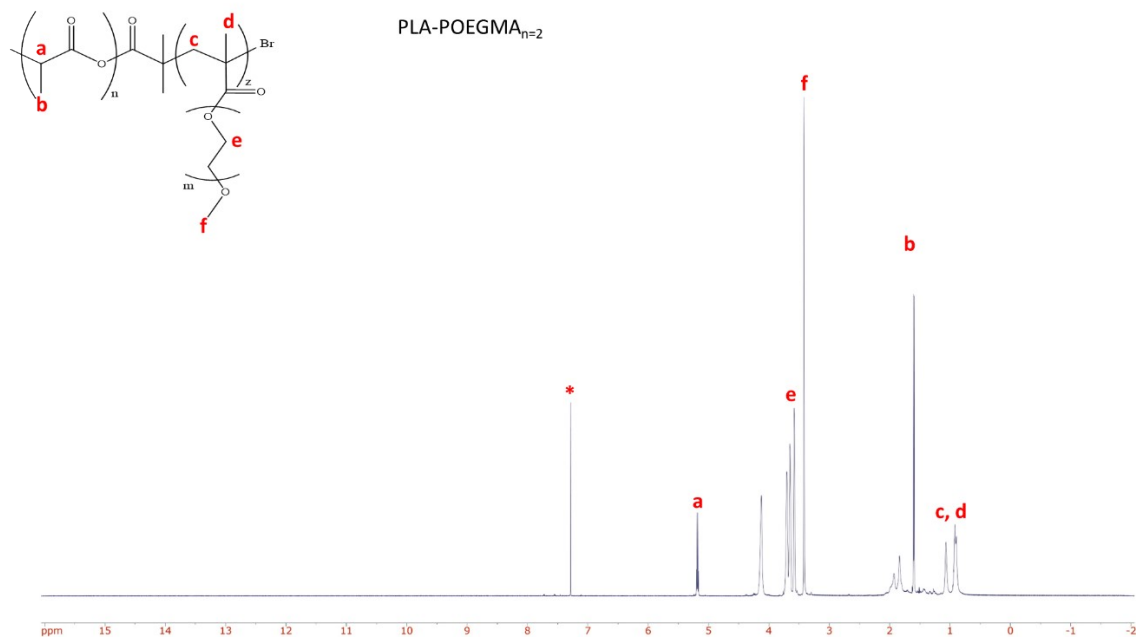

Figure S8: <sup>1</sup>H NMR spectra of PLA-POEGMA<sub>n=2</sub> polymer dissolved in deuterated chloroform (10 mg/mL polymer concentration).

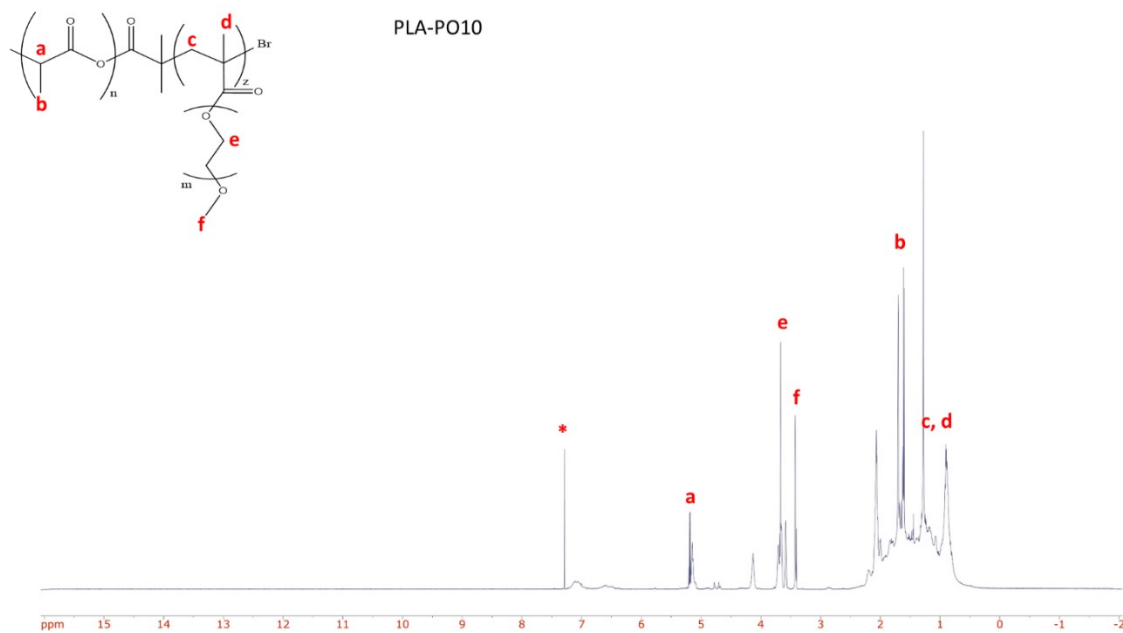

Figure S9: <sup>1</sup>H NMR spectra of PLA-PO10 polymer dissolved in deuterated chloroform (10 mg/mL polymer concentration).

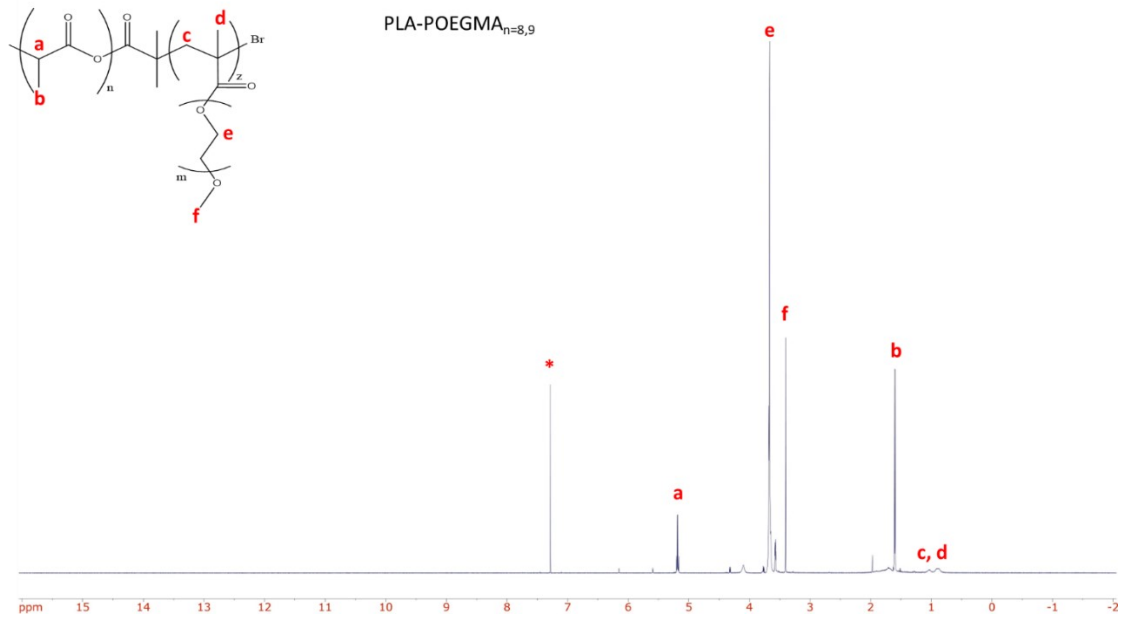

Figure S10:  $^1\text{H}$  NMR spectra of PLA-POEGMA<sub>n=8,9</sub> polymer dissolved in deuterated chloroform (10 mg/mL polymer concentration).

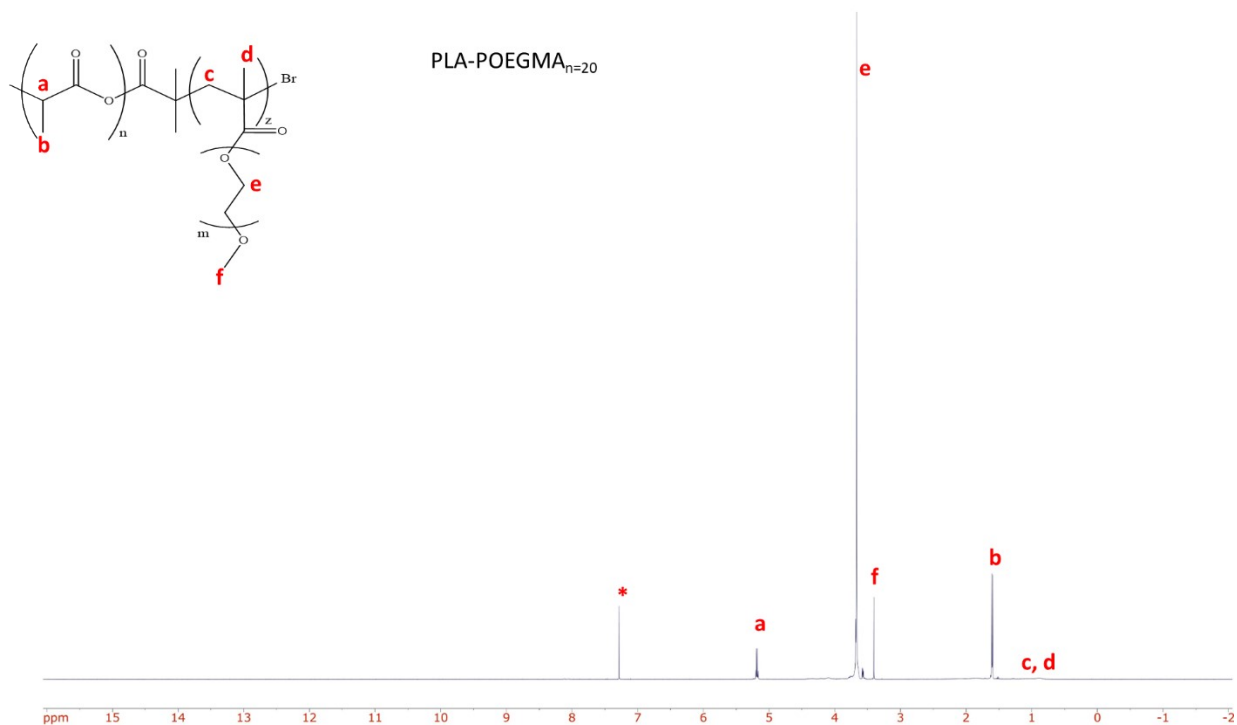

Figure S11:  $^1\text{H}$  NMR spectra of PLA-POEGMA<sub>n=20</sub> polymer dissolved in deuterated chloroform (10 mg/mL polymer concentration).

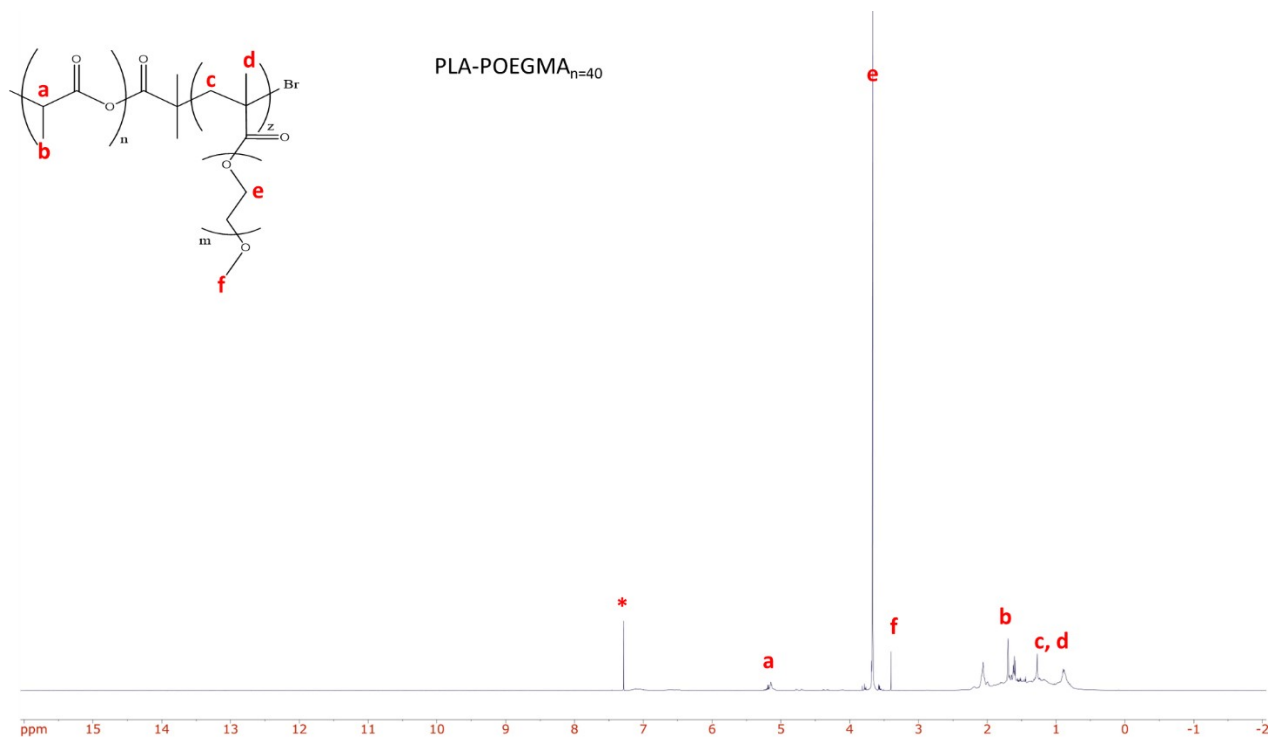

*Figure S12:* <sup>1</sup>H NMR spectra of PLA-POEGMA<sub>n=40</sub> polymer dissolved in deuterated chloroform (10 mg/mL polymer concentration).



#### 4. Rheological Synergism Measurements – Viscosity

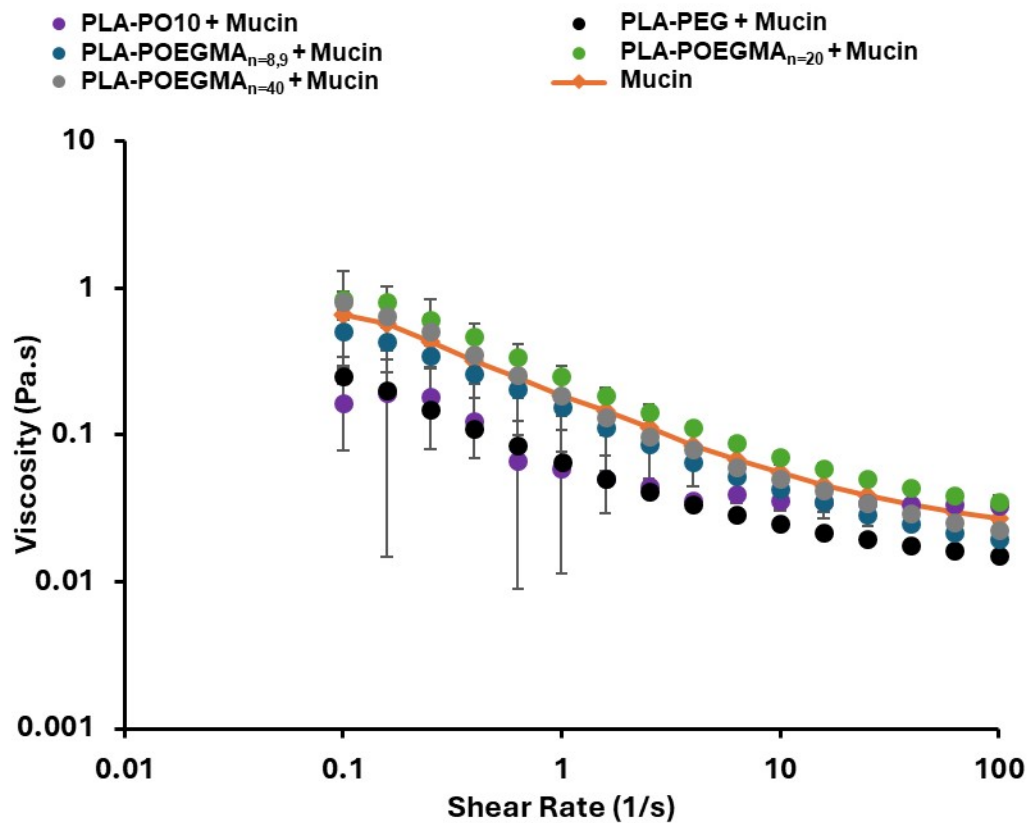

*Figure S13:* Viscosity as a function of shear rate for PLA-POEGMA<sub>n</sub> NPs incubated with 10 w/w% of mucin.

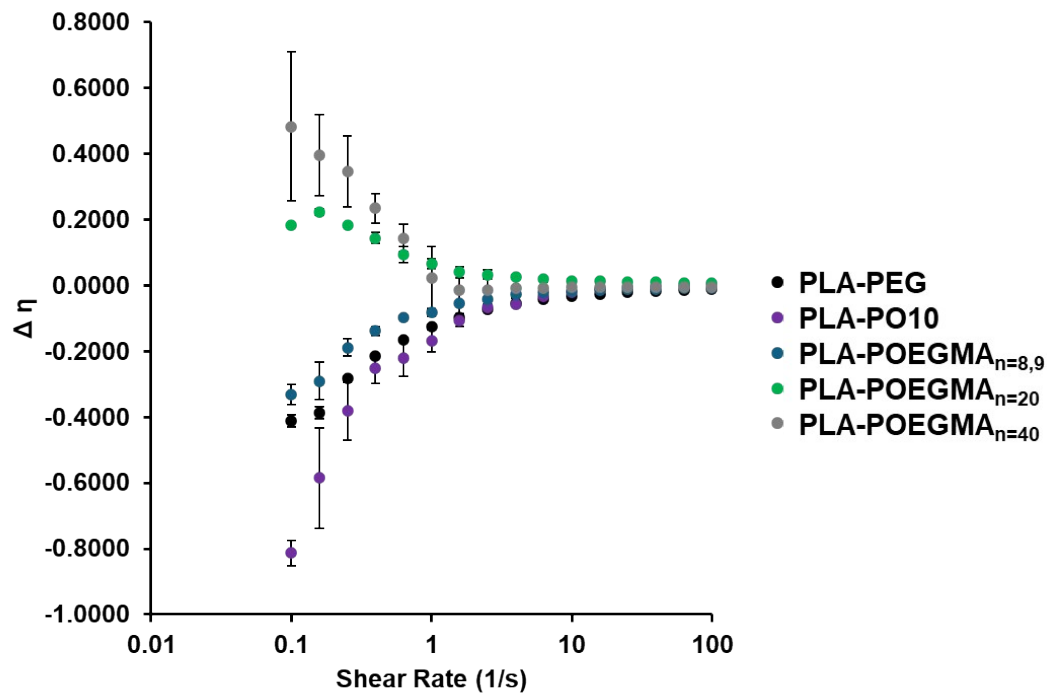

Figure S14: Viscosity synergism parameter as a function of shear rate for PLA-POEGMA<sub>n</sub> NPs incubated with 10 w/w% of mucin.

### 5. Rheological Synergism Measurements - Oscillatory Rheology

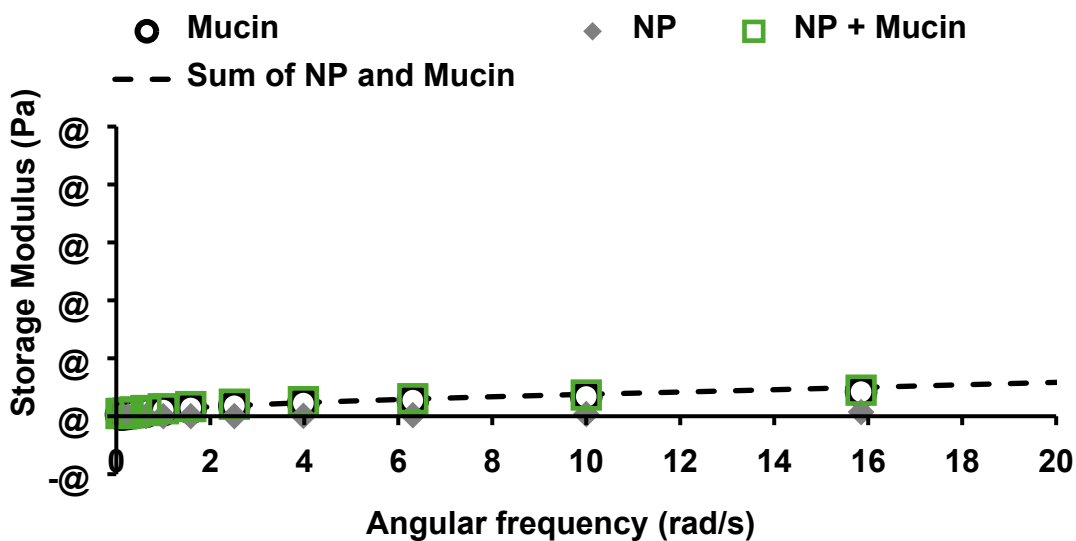

Figure S15: Storage modulus as a functional of angular frequency for PLA-POEGMA<sub>n=2</sub> NPs incubated with 10 w/w% mucin.

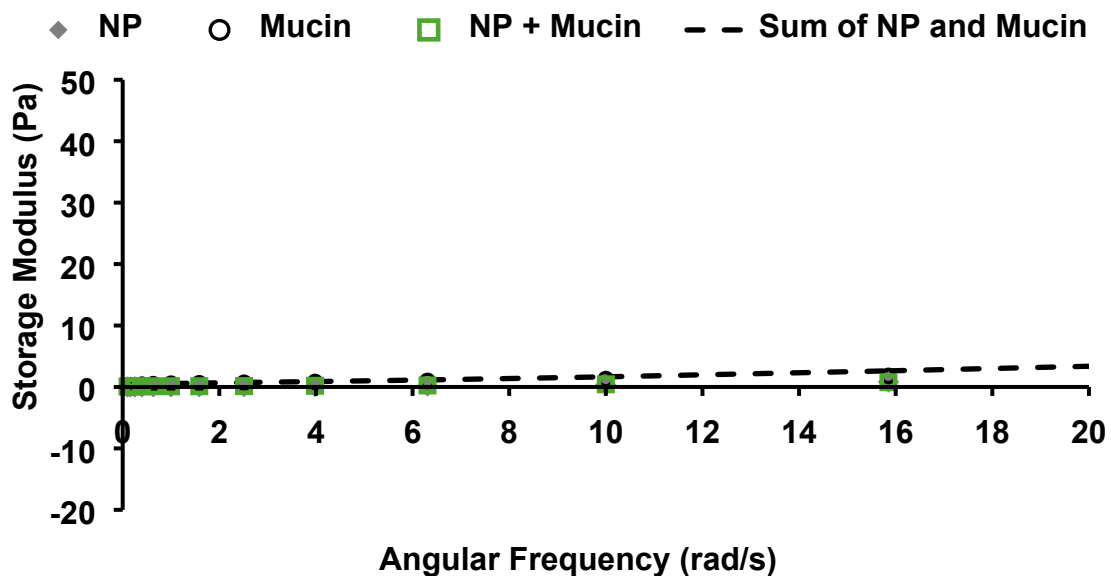

Figure S16: Storage modulus as a functional of angular frequency for PLA-PO10 NPs incubated with 10 w/w% mucin.

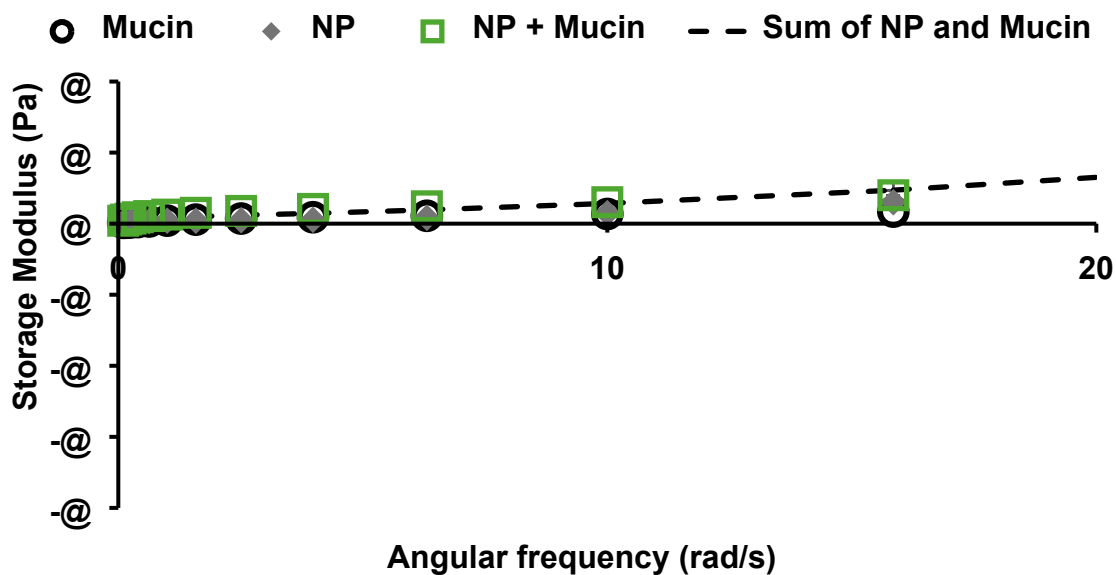

Figure S17: Storage modulus as a functional of angular frequency for PLA-POEGMA<sub>n=8,9</sub> NPs incubated with 10 w/w% mucin.

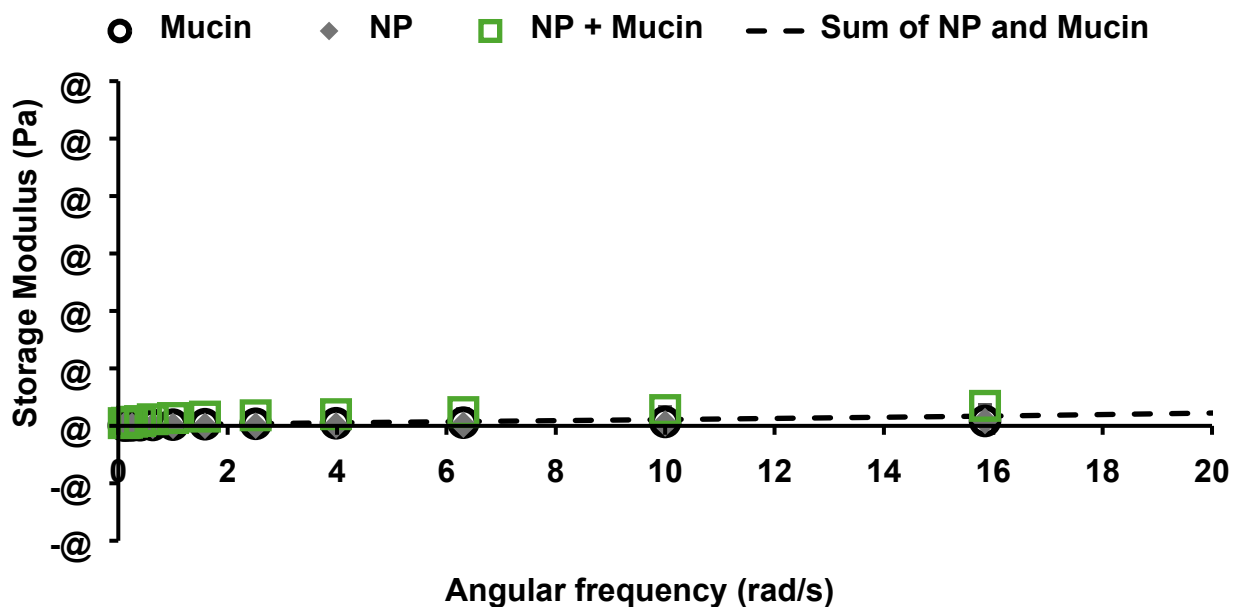

Figure S18: Storage modulus as a functional of angular frequency for PLA-POEGMA<sub>n=20</sub> NPs incubated with 10 w/w% mucin.

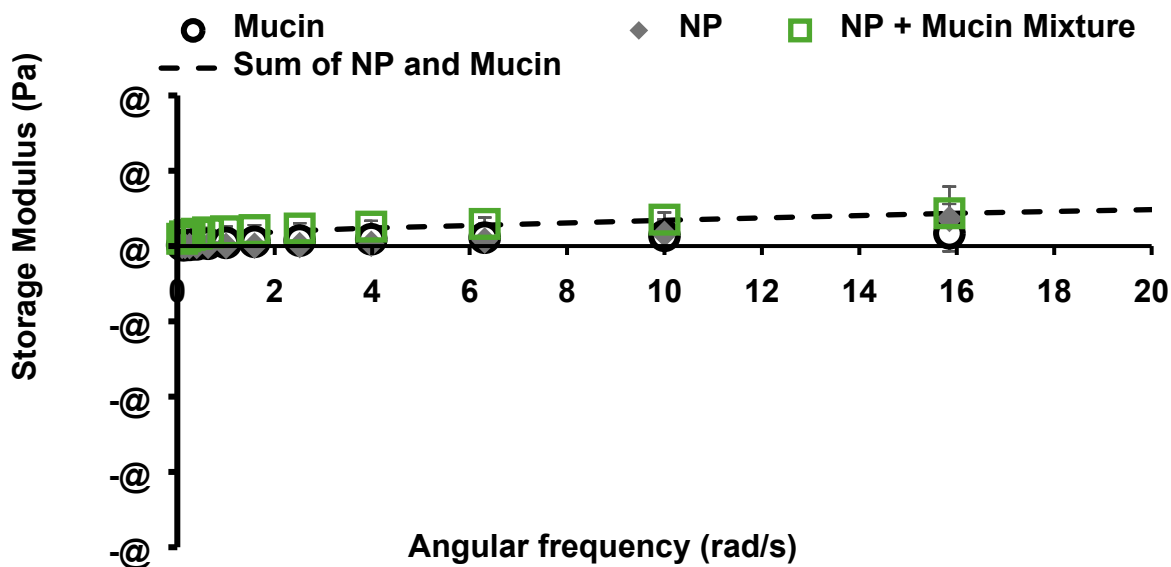

Figure S19: Storage modulus as a functional of angular frequency for PLA-POEGMA<sub>n=40</sub> NPs incubated with 10 w/w% mucin.

## 6. Raw Thermograms of Isothermal Titration Calorimetry Studies

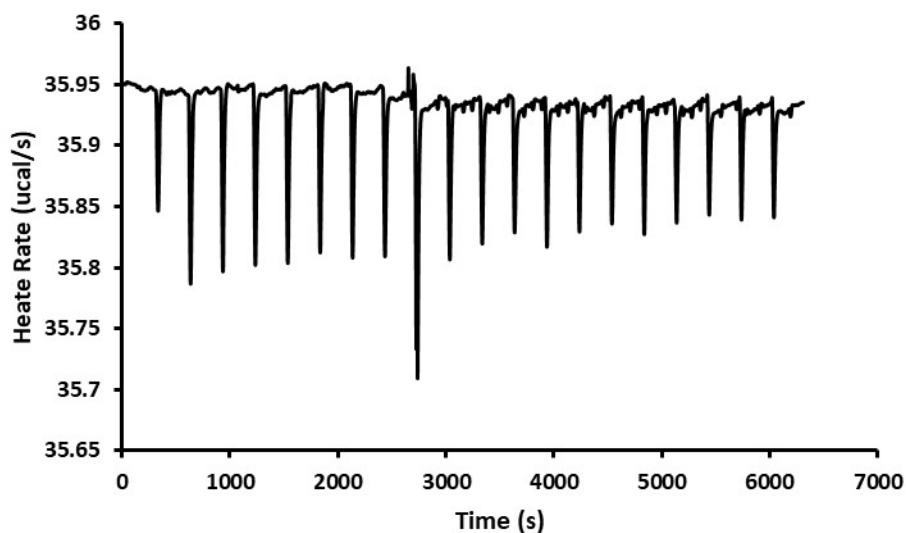

*Figure S20:* Heat rate as a functional of time for PLA-PO10 NPs injected into 0.1 mg/mL mucin over 20 injections and a period of 100 mins.

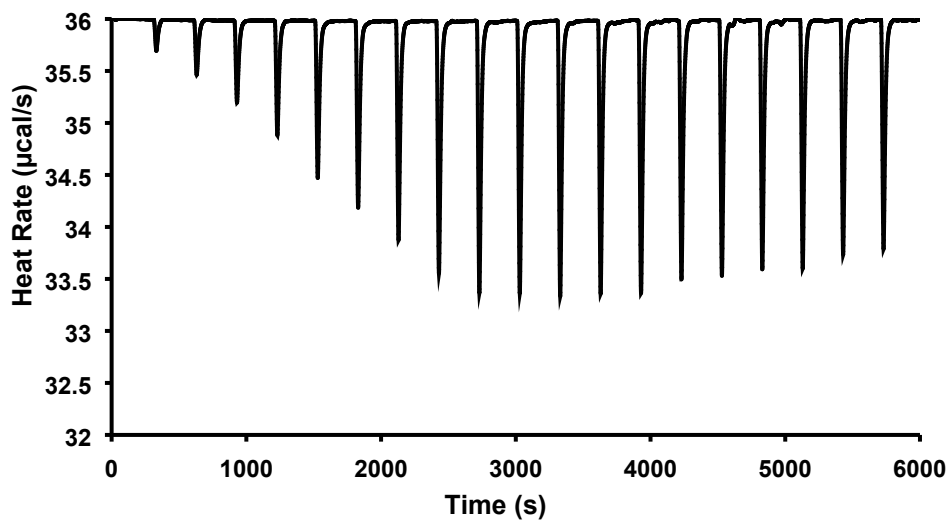

*Figure S21:* Heat rate as a functional of time for PLA-POEGMA<sub>n=8,9</sub> NPs injected into 0.1 mg/mL mucin over 20 injections and a period of 100 mins.

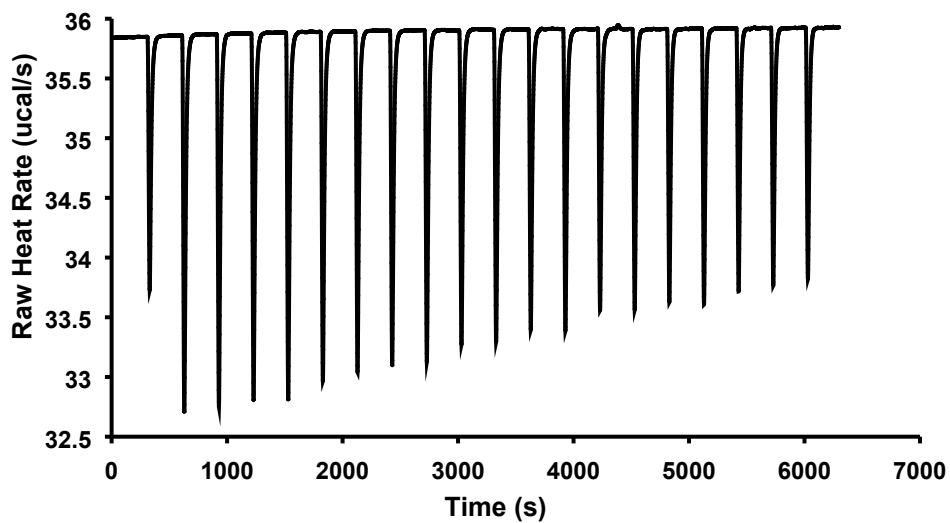

Figure S22: Heat rate as a functional of time for PLA-POEGMA<sub>n=20</sub> NPs injected into 0.1 mg/mL mucin over 20 injections and a period of 100 mins.

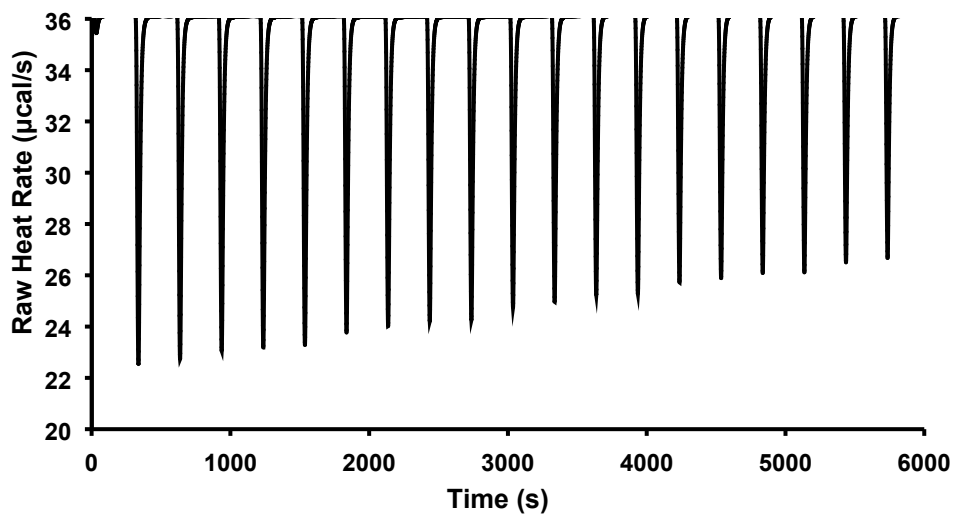

Figure S23: Heat rate as a functional of time for PLA-POEGMA<sub>n=40</sub> NPs injected into 0.1 mg/mL mucin over 20 injections and a period of 100 mins.

## 7. Mucoadhesive Screening via Particle Size Measurements

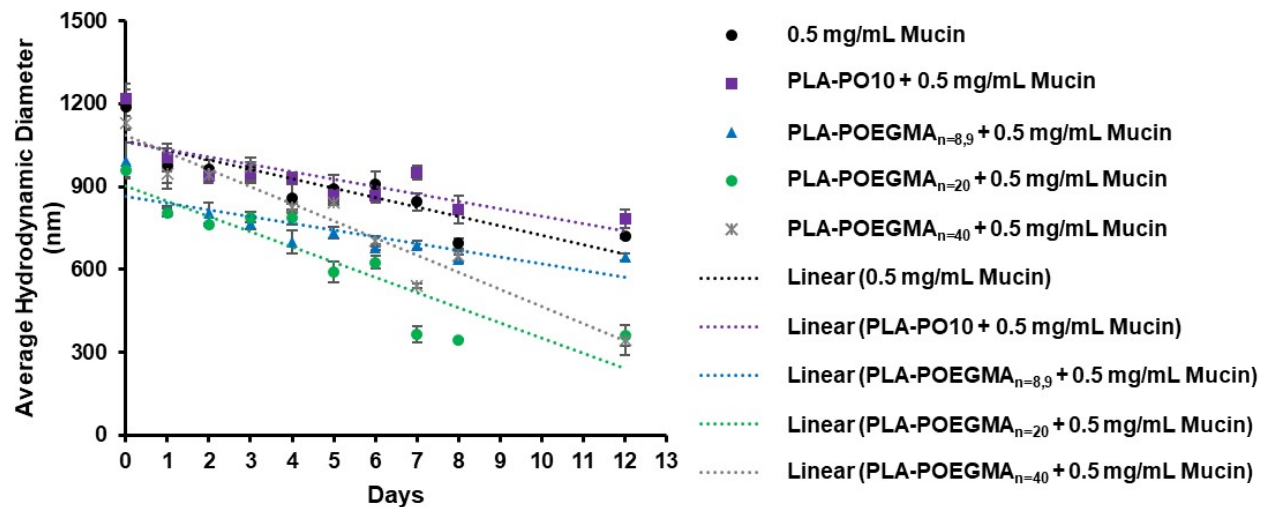

Figure S24: Particle size data for PLA-POEGMA<sub>n</sub> particles (suspended in MIQ at a concentration of 0.25 mg/mL) incubated with mucin (0.5 mg/mL) over a 12-day observation period.

## 8. H&E Staining of Corneas Following Nanoparticle Treatment

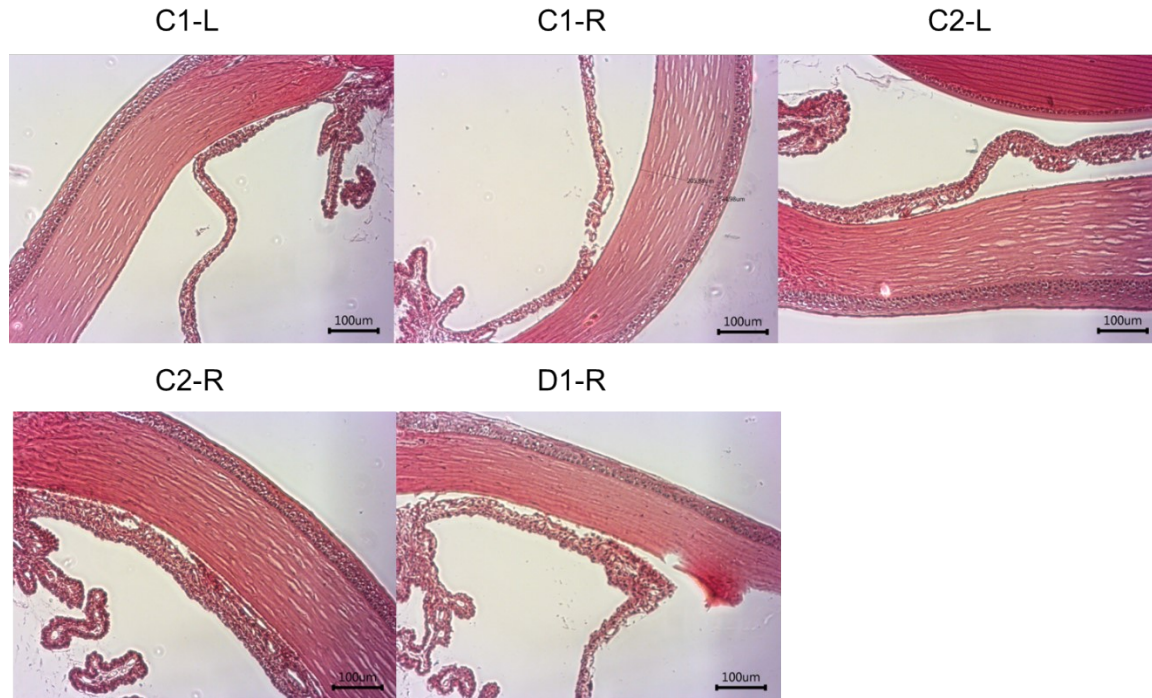

*Figure S25:* H&E-stained histology slices for rat eyes treated with PLA-PO10 NPs daily with an instillation of 20  $\mu$ L of 5 mg/mL over a 7-day period.



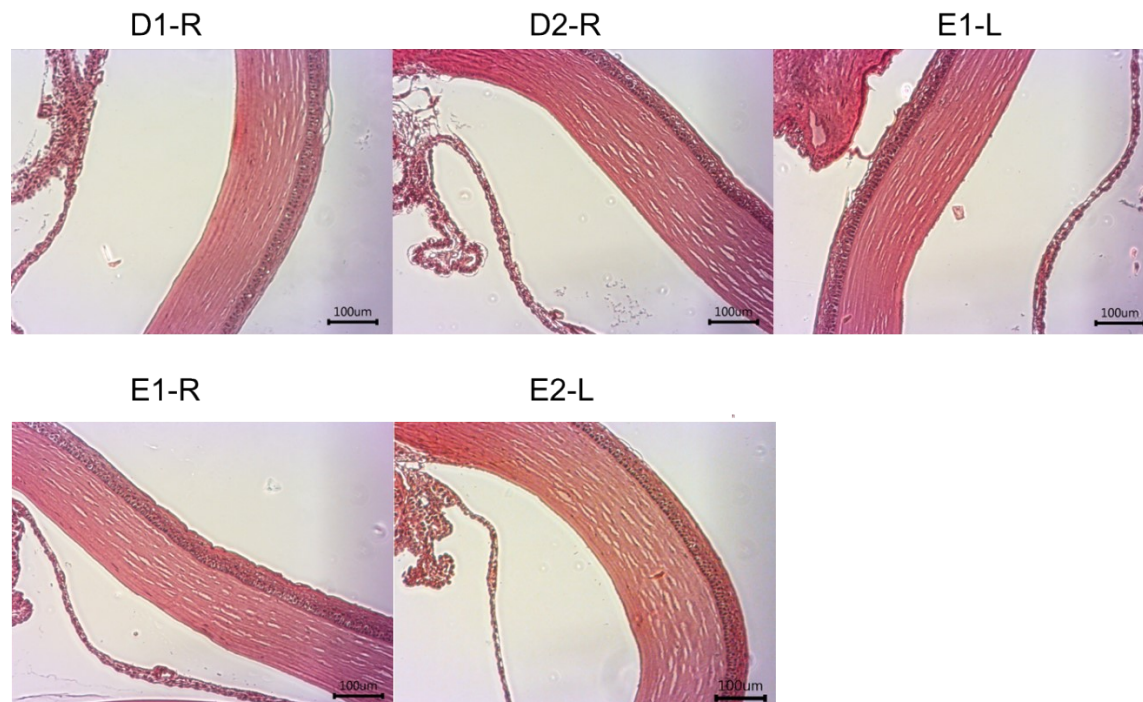

*Figure S26:* H&E-stained histology slices for rat eyes treated with PLA-POEGMA<sub>n=8,9</sub> NPs daily with an instillation of 20 µL of 5 mg/mL over a 7-day period.

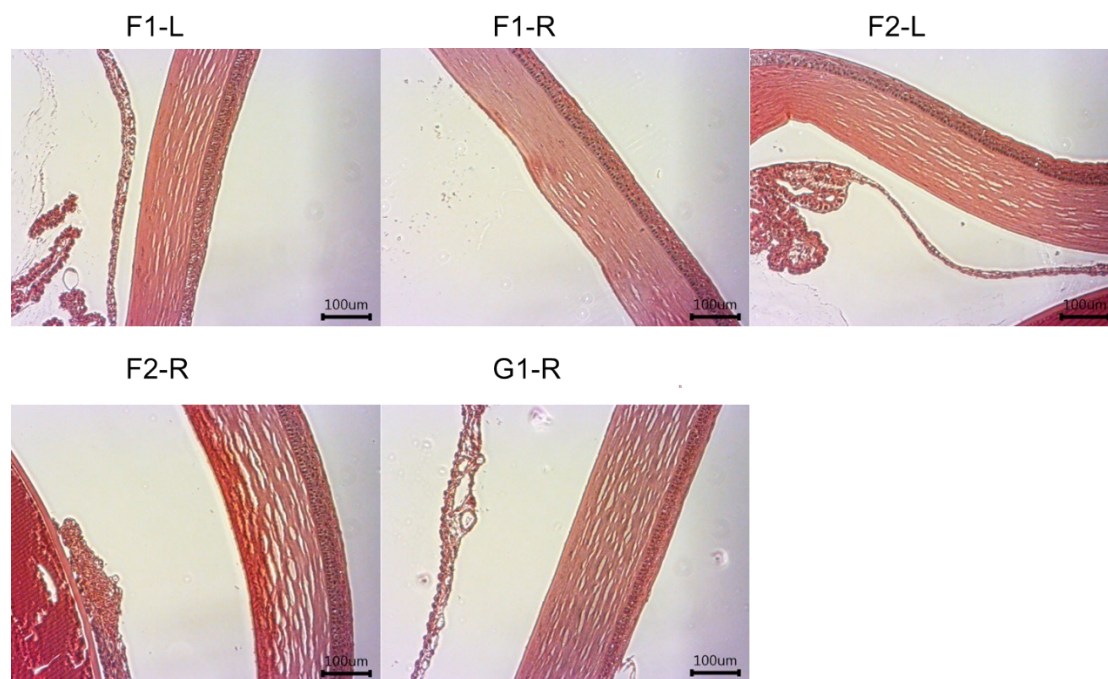

*Figure S27:* H&E-stained histology slices for rat eyes treated with PLA-POEGMA<sub>n=20</sub> NPs daily with an instillation of 20 µL of 5 mg/mL over a 7-day period.

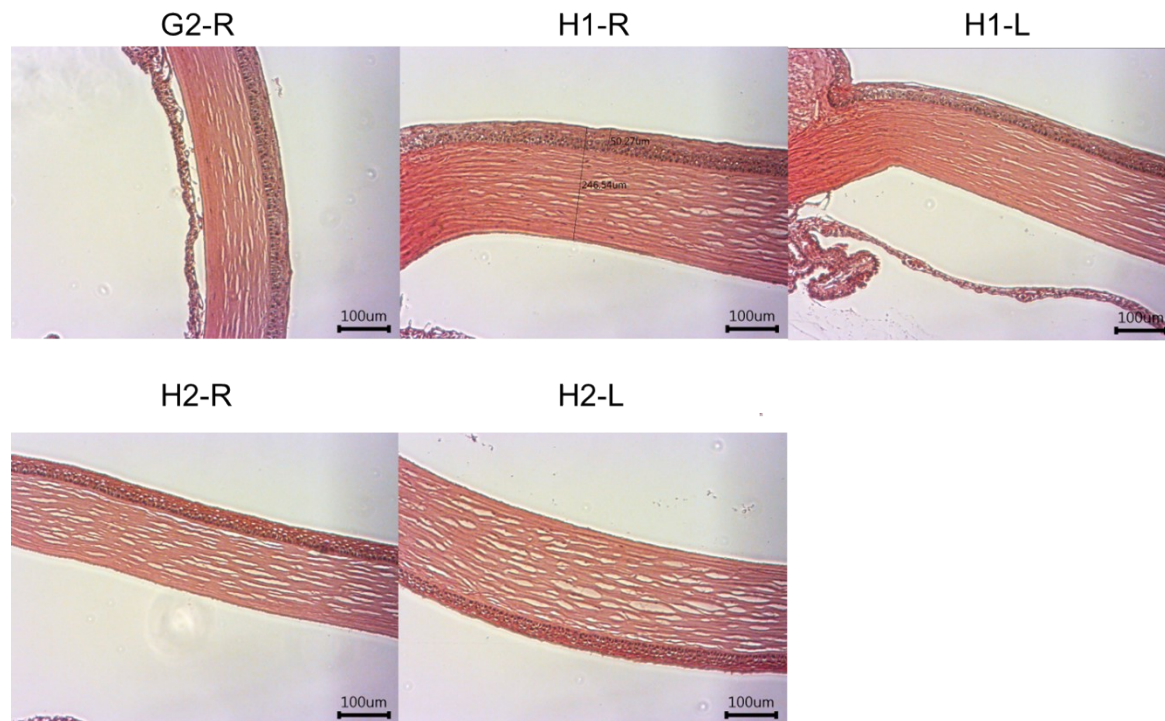

*Figure S28:* H&E-stained histology slices for rat eyes treated with PLA-POEGMA<sub>n=40</sub> NPs daily with an instillation of 20 μL of 5 mg/mL over a 7-day period.

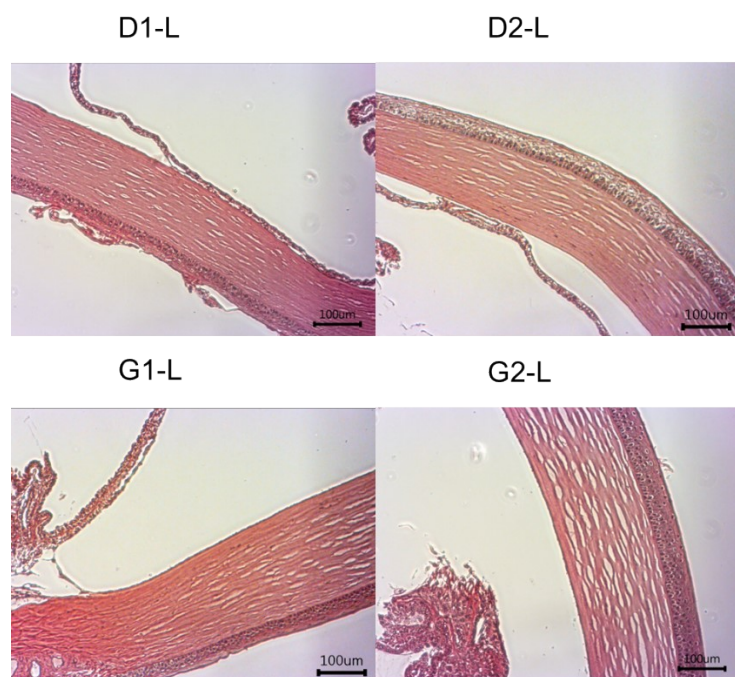

*Figure S29:* H&E-stained histology slices for rat eyes treated with saline as a control daily with an instillation of 20 μL of 5 mg/mL over a 7-day period.
